# Supplementary material for: Reply to: Multivariate BWAS can be replicable with moderate sample sizes
Source: PubMed Central journal article supplement (PMC9995264; doi:10.1038/s41586-023-05746-w), 2023-03-08
Supplement: 41586_2023_5746_MOESM2_ESM.pdf [file 41586_2023_5746_MOESM2_ESM.pdf]

## Reporting Summary

Nature Portfolio wishes to improve the reproducibility of the work that we publish. This form provides structure for consistency and transparency in reporting. For further information on Nature Portfolio policies, see our [Editorial Policies](#) and the [Editorial Policy Checklist](#).

### Statistics

For all statistical analyses, confirm that the following items are present in the figure legend, table legend, main text, or Methods section.

n/a Confirmed

- The exact sample size ( $n$ ) for each experimental group/condition, given as a discrete number and unit of measurement
- A statement on whether measurements were taken from distinct samples or whether the same sample was measured repeatedly
- The statistical test(s) used AND whether they are one- or two-sided  
*Only common tests should be described solely by name; describe more complex techniques in the Methods section.*
- A description of all covariates tested
- A description of any assumptions or corrections, such as tests of normality and adjustment for multiple comparisons
- A full description of the statistical parameters including central tendency (e.g. means) or other basic estimates (e.g. regression coefficient) AND variation (e.g. standard deviation) or associated estimates of uncertainty (e.g. confidence intervals)
- For null hypothesis testing, the test statistic (e.g.  $F$ ,  $t$ ,  $r$ ) with confidence intervals, effect sizes, degrees of freedom and  $P$  value noted  
*Give  $P$  values as exact values whenever suitable.*
- For Bayesian analysis, information on the choice of priors and Markov chain Monte Carlo settings
- For hierarchical and complex designs, identification of the appropriate level for tests and full reporting of outcomes
- Estimates of effect sizes (e.g. Cohen's  $d$ , Pearson's  $r$ ), indicating how they were calculated

*Our web collection on [statistics for biologists](#) contains articles on many of the points above.*

### Software and code

Policy information about [availability of computer code](#)

**Data collection** No software was used for data collection. Neuroimaging and behavioral data were from existing, open-source datasets (ABCD, UKB, HCP) whose acquisition's are presented in detail in previous work. The ABCD Study data were collected between 2016-2018. The HCP data were collected between 2010-2016.

**Data analysis** MRI data analysis code can be found here: <https://github.com/ABCD-STUDY/nda-abcd-collection-3165>  
ABCD and UKB MRI data processing code can be found here <https://github.com/DCAN-Labs/abcd-hcp-pipeline>  
Manuscript analysis code can be found here [https://gitlab.com/DosenbachGreene/bwas\\_response](https://gitlab.com/DosenbachGreene/bwas_response)  
FIRMM software: [https://firmm.readthedocs.io/en/latest/release\\_notes/](https://firmm.readthedocs.io/en/latest/release_notes/). ABCD uses version 3.0.14.

For manuscripts utilizing custom algorithms or software that are central to the research but not yet described in published literature, software must be made available to editors and reviewers. We strongly encourage code deposition in a community repository (e.g. GitHub). See the Nature Portfolio [guidelines for submitting code & software](#) for further information.

### Data

Policy information about [availability of data](#)

All manuscripts must include a [data availability statement](#). This statement should provide the following information, where applicable:

- Accession codes, unique identifiers, or web links for publicly available datasets
- A description of any restrictions on data availability
- For clinical datasets or third party data, please ensure that the statement adheres to our [policy](#)

Participant level data from all datasets (ABCD & HCP) is openly available pursuant to individual, consortia-level data access rules. The ABCD data repository grows and changes over time. The ABCD data used in this report came from ABCD collection 3165 and the Annual Release 2.0, DOI 10.15154/1503209.

Data were provided, in part, by the Human Connectome Project, WU-Minn Consortium (Principal Investigators: David Van Essen and Kamil Ugurbil; 1U54MH091657) funded by the 16 NIH Institutes and Centers that support the NIH Blueprint for Neuroscience Research; and by the McDonnell Center for Systems Neuroscience at Washington University. Some data used in the present study are available for download from the Human Connectome Project ([www.humanconnectome.org](http://www.humanconnectome.org)). Users must agree to data use terms for the HCP before being allowed access to the data and ConnectomeDB, details are provided at <https://www.humanconnectome.org/study/hcp-young-adult/data-use-terms>. No new data were collected for this manuscript. Across the ABCD, and HCP we downloaded data between 01/2019 - 10/2021. We did not use any specific software for downloading the data. For details on data collection in ABCD (baseline data), see Casey et al., 2018; in HCP (1200 release) see Van Essen et al., 2013).

## Field-specific reporting

Please select the one below that is the best fit for your research. If you are not sure, read the appropriate sections before making your selection.

Life sciences  Behavioural & social sciences  Ecological, evolutionary & environmental sciences

For a reference copy of the document with all sections, see [nature.com/documents/nr-reporting-summary-flat.pdf](https://www.nature.com/documents/nr-reporting-summary-flat.pdf)

## Behavioural & social sciences study design

All studies must disclose on these points even when the disclosure is negative.

|                   |                                                                                                                                                                                                                                                                                                                                                                                                                                                                                                                                                                                                                                                                                                                                                                                                                                                                                                                                                                         |
|-------------------|-------------------------------------------------------------------------------------------------------------------------------------------------------------------------------------------------------------------------------------------------------------------------------------------------------------------------------------------------------------------------------------------------------------------------------------------------------------------------------------------------------------------------------------------------------------------------------------------------------------------------------------------------------------------------------------------------------------------------------------------------------------------------------------------------------------------------------------------------------------------------------------------------------------------------------------------------------------------------|
| Study description | Quantitative analyses of the magnitude and reproducibility of cross-sectional associations between neuroimaging measures and psychological/psychiatric phenotypes.                                                                                                                                                                                                                                                                                                                                                                                                                                                                                                                                                                                                                                                                                                                                                                                                      |
| Research sample   | Our main focus was to replicate work from Spisak et al in both the dataset used in their paper (HCP) and to further test generalizability of their models. Therefore, we also tested their models on the larger ABCD dataset.                                                                                                                                                                                                                                                                                                                                                                                                                                                                                                                                                                                                                                                                                                                                           |
| Sampling strategy | All samples were recruited from the community (ABCD & HCP from the USA). Individual samples (ABCD, HCP) used unique sample size calculations and sampling strategies which are discussed in prior work with these open source datasets (Casey et al., 2018, Van Essen et al., 2013, respectively).                                                                                                                                                                                                                                                                                                                                                                                                                                                                                                                                                                                                                                                                      |
| Data collection   | All data were from existing data repositories and were downloaded between 01/2019 - 10/2021. Data used in the manuscript were from existing large consortia datasets (ABCD: see Casey et al., 2018 & Barch et al., 2018; HCP: We used data from the 1200 subjects data release (van Essen et al., 2013). Because we did not personally collect any of the data used in this manuscript, all data were from existing data repositories and researchers were therefore not blind to the source of the data.                                                                                                                                                                                                                                                                                                                                                                                                                                                               |
| Timing            | ABCD: see Casey et al., 2018<br>HCP: see van Essen et al., 2013                                                                                                                                                                                                                                                                                                                                                                                                                                                                                                                                                                                                                                                                                                                                                                                                                                                                                                         |
| Data exclusions   | In ABCD, we used strict inclusion criteria with regard to head motion. Specifically, inclusion criteria for the current project consisted of at least 600 frames (8 minutes) of low-motion (filtered $FD < 0.08$ ) resting state functional connectivity data. Our final dataset consisted of data from a total of $N=3,928$ youth across the discovery ( $N=1,964$ ) and replication ( $N=1,964$ ) sets. The final discovery and replication sets did not differ in mean $FD$ ( $\Delta M=0.002$ , $t=0.60$ , $p=0.55$ ) or total frames included ( $\Delta M=6.4$ , $t=0.94$ , $p=0.35$ ). The subject lists for ARMS samples and our associated matrices will be released in the ABCD-BIDS Community Collection (ABCD collection 3165) for community use.<br>For HCP data, we used similar data quantity inclusion, as well as an $FD < 0.20$ (unfiltered $FD$ ). This resulted in the inclusion of $N=900$ individuals ( $N=877$ across all NIH Toolbox subscales). |
| Non-participation | N/A                                                                                                                                                                                                                                                                                                                                                                                                                                                                                                                                                                                                                                                                                                                                                                                                                                                                                                                                                                     |
| Randomization     | All three samples were observational studies and no randomization was used.                                                                                                                                                                                                                                                                                                                                                                                                                                                                                                                                                                                                                                                                                                                                                                                                                                                                                             |

## Reporting for specific materials, systems and methods

We require information from authors about some types of materials, experimental systems and methods used in many studies. Here, indicate whether each material, system or method listed is relevant to your study. If you are not sure if a list item applies to your research, read the appropriate section before selecting a response.

## Materials &amp; experimental systems

## Methods

- n/a  Involved in the study
- Antibodies
- Eukaryotic cell lines
- Palaeontology and archaeology
- Animals and other organisms
- Human research participants
- Clinical data
- Dual use research of concern

- n/a  Involved in the study
- ChIP-seq
- Flow cytometry
- MRI-based neuroimaging

## Human research participants

Policy information about [studies involving human research participants](#)

Population characteristics

See above.

Recruitment

See above.

Ethics oversight

The ABCD Study obtained centralized institutional review board approval from the University of California, San Diego, and each of the 21 study sites obtained local institutional review board approval. Ethical regulations were followed during data collection and analysis. Parents or caregivers provided written informed consent, and children gave written assent.

Note that full information on the approval of the study protocol must also be provided in the manuscript.

## Magnetic resonance imaging

## Experimental design

Design type

resting-state fMRI, task-based fMRI; structural (cortical thickness) MRI

Design specifications

ABCD resting state: 4, 5 min runs, eyes open  
HCP resting state: 4, 15 min runs, eyes open

Behavioral performance measures

Primary analyses use cognitive assessments from the NIH Toolbox and psychopathology assessment Child Behavior Checklist (see manuscript for individual subscales, total of 41 ) included in standard data releases and discussed in detail perviously (Barch et al., 2018)

## Acquisition

Imaging type(s)

Resting-state fMRI, task-fMRI, structural (cortical thickness) MRI

Field strength

3 Tesla

Sequence & imaging parameters

Primary analyses use open-source distributed fMRI and MR data that adhere to consortia guidelines (see Casey et al., 2018 and Van Essen et al., 2013, for ABCD and HCP, respectively).

Area of acquisition

Whole brain

Diffusion MRI

Used

Not used

## Preprocessing

Preprocessing software

Preprocessing of ABCD was done using a suite of tools. All code can be found here: <https://github.com/ABCD-STUDY/nda-abcd-collection-3165>. Individual datasets (ABCD, HCP) and individual study sites (e.g., ABCD site 1 versus site 2) used unique sequence and imaging parameters which are discussed in prior work introducing these open-source datasets.

Normalization

1) PreFreesurfer normalizes anatomical data. This normalization entails brain extraction, denoising, and then bias field correction on anatomical T1 and/or T2 weighted data. The ABCD-HCP pipeline includes two additional modifications to improve output image quality. ANTs 65 DenoiseImage models scanner noise as a Rician distribution and attempts to remove such noise from the T1 and T2 anatomical images. Additionally, ANTs N4BiasFieldCorrection attempts to smooth relative image histograms in different parts of the brain and improves bias field correction. 2) FreeSurfer 1 constructs cortical surfaces from the normalized anatomical data. This stage performs anatomical segmentation, white/grey and grey/CSF cortical surface construction, and surface registration to a standard surface template. Surfaces are refined using the T2 weighted anatomical data. Mid-thickness surfaces, which represent the average of white/grey and grey/CSF surfaces, are generated here. 3) PostFreesurfer converts prior outputs into an HCP-compatible format (i.e. CIFTIs) and transforms the volumes to a standard volume template space using ANTs nonlinear registration, and the surfaces to the standard surface

|                            |                                                                                                                                                                                                                                                                                                                                                                                                                                                                                                                                                                                                                                                                                                                                                                                                                                                                                                                                                                                                                                                                                                 |
|----------------------------|-------------------------------------------------------------------------------------------------------------------------------------------------------------------------------------------------------------------------------------------------------------------------------------------------------------------------------------------------------------------------------------------------------------------------------------------------------------------------------------------------------------------------------------------------------------------------------------------------------------------------------------------------------------------------------------------------------------------------------------------------------------------------------------------------------------------------------------------------------------------------------------------------------------------------------------------------------------------------------------------------------------------------------------------------------------------------------------------------|
|                            | space via spherical registration.                                                                                                                                                                                                                                                                                                                                                                                                                                                                                                                                                                                                                                                                                                                                                                                                                                                                                                                                                                                                                                                               |
| Normalization template     | The “Vol” stage corrects for functional distortions via reverse-phase encoding spin-echo images. All resting state runs underwent intensity normalization to a whole brain mode value of 1000, within run correction for head movement, and functional data registration to the standard template (MNI). Atlas transformation was computed by registering the mean intensity image from each BOLD session to the high resolution T1 image, and then applying the anatomical registration to the BOLD image. This atlas transformation, mean field distortion correction, and resampling to 3-mm isotropic atlas space were combined into a single interpolation using FSL’s 66 applywarp tool. The “Surf” stage projects the normalized functional data onto the template surfaces.                                                                                                                                                                                                                                                                                                             |
| Noise and artifact removal | Additional BOLD preprocessing steps were executed to reduce spurious variance unlikely to reflect neuronal activity 46. First, a respiratory filter was used to improve FD estimates calculated in the volume (“vol”) stage <sup>68</sup> . Second, temporal masks were created to flag motion-contaminated frames using the improved FD estimates <sup>63</sup> . Frames with a filtered FD>0.3mm were flagged as motion-contaminated for nuisance regression only. After computing the temporal masks for high motion frame censoring, the data were processed with the following steps: (i) demeaning and detrending, (ii) interpolation across censored frames using least squares spectral estimation of the values at censored frames so that continuous data can be (iii) denoised via a GLM with whole brain, ventricular, and white matter signal regressors, as well as their derivatives. Denoised data were then passed through (iv) a band-pass filter (0.008 Hz<f<0.10 Hz) without re-introducing nuisance signals <sup>69</sup> or contaminating frames near high motion frames. |
| Volume censoring           | Yes, ABCD data were censored at a filtered frame-wise displacement of < 0.08mm and HCP data were filtered using a non-filtered framewise displacement of <0.20mm.                                                                                                                                                                                                                                                                                                                                                                                                                                                                                                                                                                                                                                                                                                                                                                                                                                                                                                                               |

## Statistical modeling & inference

|                                                                           |                                                                                                                                                                                                                                                                                            |
|---------------------------------------------------------------------------|--------------------------------------------------------------------------------------------------------------------------------------------------------------------------------------------------------------------------------------------------------------------------------------------|
| Model type and settings                                                   | Mass univariate and multivariate (support vector regression, canonical correlation analysis). Multiple parameterizations of each of these models were explored with the stated goal being to determine field-wide reproducibility in brain-phenotype association studies (see manuscript). |
| Effect(s) tested                                                          | As the primary aim of the paper was to determine the general reproducibility of brain-phenotype effects, multiple scales and combinations of effects were examined. Owing to the cross-sectional, nature of these studies, all effects are between-person associations.                    |
| Specify type of analysis:                                                 | <input type="checkbox"/> Whole brain <input type="checkbox"/> ROI-based <input checked="" type="checkbox"/> Both                                                                                                                                                                           |
| Anatomical location(s)                                                    | Parcel-level and network-level analyses utilized the field-standard Gordon et al., 2016, Cerebral Cortex, and Seitzman et al., 2020, NeuroImage. Vertex-wise and voxel-wise data were extracted from Ciftis.                                                                               |
| Statistic type for inference<br>(See <a href="#">Eklund et al. 2016</a> ) | Multiple levels of neuroanatomical scale were used, including voxels, regions of interest, and networks.                                                                                                                                                                                   |
| Correction                                                                | As the primary aim of the paper was to determine the general reproducibility of brain-phenotype effects, multiple levels of significance values and correction were used, ranging from uncorrected to bonferroni (FWER) correction.                                                        |

## Models & analysis

|                                               |                                                                                                                                                                                                                                                                                                                                                                                                                                                                                                                                                                                                                                                                                                                                                                                                                                                                                                                                                                                                                                                                                                                                                                                                                                                                                                                                                                                                                                                                                                                                                                                                                                                                                                                                                                                                                                                                                                                                                                                                                                                      |
|-----------------------------------------------|------------------------------------------------------------------------------------------------------------------------------------------------------------------------------------------------------------------------------------------------------------------------------------------------------------------------------------------------------------------------------------------------------------------------------------------------------------------------------------------------------------------------------------------------------------------------------------------------------------------------------------------------------------------------------------------------------------------------------------------------------------------------------------------------------------------------------------------------------------------------------------------------------------------------------------------------------------------------------------------------------------------------------------------------------------------------------------------------------------------------------------------------------------------------------------------------------------------------------------------------------------------------------------------------------------------------------------------------------------------------------------------------------------------------------------------------------------------------------------------------------------------------------------------------------------------------------------------------------------------------------------------------------------------------------------------------------------------------------------------------------------------------------------------------------------------------------------------------------------------------------------------------------------------------------------------------------------------------------------------------------------------------------------------------------|
| n/a                                           | Involvement in the study                                                                                                                                                                                                                                                                                                                                                                                                                                                                                                                                                                                                                                                                                                                                                                                                                                                                                                                                                                                                                                                                                                                                                                                                                                                                                                                                                                                                                                                                                                                                                                                                                                                                                                                                                                                                                                                                                                                                                                                                                             |
| <input type="checkbox"/>                      | <input checked="" type="checkbox"/> Functional and/or effective connectivity                                                                                                                                                                                                                                                                                                                                                                                                                                                                                                                                                                                                                                                                                                                                                                                                                                                                                                                                                                                                                                                                                                                                                                                                                                                                                                                                                                                                                                                                                                                                                                                                                                                                                                                                                                                                                                                                                                                                                                         |
| <input checked="" type="checkbox"/>           | <input type="checkbox"/> Graph analysis                                                                                                                                                                                                                                                                                                                                                                                                                                                                                                                                                                                                                                                                                                                                                                                                                                                                                                                                                                                                                                                                                                                                                                                                                                                                                                                                                                                                                                                                                                                                                                                                                                                                                                                                                                                                                                                                                                                                                                                                              |
| <input type="checkbox"/>                      | <input checked="" type="checkbox"/> Multivariate modeling or predictive analysis                                                                                                                                                                                                                                                                                                                                                                                                                                                                                                                                                                                                                                                                                                                                                                                                                                                                                                                                                                                                                                                                                                                                                                                                                                                                                                                                                                                                                                                                                                                                                                                                                                                                                                                                                                                                                                                                                                                                                                     |
| Functional and/or effective connectivity      | Pearson correlation                                                                                                                                                                                                                                                                                                                                                                                                                                                                                                                                                                                                                                                                                                                                                                                                                                                                                                                                                                                                                                                                                                                                                                                                                                                                                                                                                                                                                                                                                                                                                                                                                                                                                                                                                                                                                                                                                                                                                                                                                                  |
| Multivariate modeling and predictive analysis | <p>Two supervised regression models were used: a Ridge Regression model (<math>\alpha = 1.0</math>), as proposed by Spisak et al. and a combined Principal Component Analysis (PCA) and Support Vector Regression (SVR) model, whereby half of the principal components (retaining 50% of the variance) generated from the PCA were passed as features into the SVR, as in the original work by Marek, Tervo-Clemmens et al. Both models were implemented using scikit-learn 5 in Python 3.</p> <p>For both HCP and ABCD datasets, both methods (ridge regression; PCA+SVR) and using three different neuroimaging feature sets (RSFC: full correlation, partial correlation; cortical thickness), the same analyses were conducted using code directly from Spisak et al. (<a href="https://gitlab.com/DosenbachGreene/bwas_response">https://gitlab.com/DosenbachGreene/bwas_response</a>). For each behavioural phenotype and neuroimaging feature set combination, in each dataset, a complete cases sub-dataset was compiled, removing participants with missing behavioural phenotypes or neuroimaging data. For each of these complete cases (per Spisak et al.) neuroimaging feature set behavioural phenotype sub-datasets, 100 bootstraps were run for each model. Within each bootstrap, the sub-dataset was equally and randomly split into a discovery and replication set based on a given sample size. Here, sample size is defined as the size of a sole discovery/training set (identical in size to the replication set), such that given a sample size <math>n</math>, the total number of participants/samples of the combined discovery and replication sets is <math>2n</math>.</p> <p>Following Spisak et al. (method and code), the discovery set was divided again into 10 cross-validation folds. However, unlike the nested cross-validation which was explored in our original manuscript and shown to not substantively change results (Marek, Tervo-Clemmens et al. 1: Supplemental Fig. S11, S12), this procedure</p> |

utilised by Spisak et al., and repeated here, did not use the additional cross-validation step for hyperparameter tuning. Rather an additional out-of-sample test was applied to the discovery dataset. The analyses and Figures (Fig. 1, 2) in this work use combinations of Spisak et al.'s methodological suggestions and those from our original work to replicate, expand, and clarify Spisak et al.'s Matters Arising commentary and to provide a more comprehensive perspective on out-of-sample multivariate BWAS effects. Rationale and additional details for specific analyses are provided in the relevant "Main Text" and "Figure Captions". In all cases, out-of-sample associations were evaluated as the correlation between the predicted phenotype score and the true score in the out-of-sample data. In-sample (training) associations were evaluated as the correlation between the true score and the predicted score from the model developed in the discovery set (that is, the data in the sample used to develop the model (Fig. 1).

Successful out-of-sample replication was defined as in Spisak et al.: 80% of bootstrapped iterations for a given behavioural phenotype-brain feature set ("BWAS") that were significant (via permutation test) in the first cross-validation test are significant in the second, split half test. We note this definition of replication by Spisak et al. thus does not consider all bootstrap iterations ( $n = 100$ ) run when determining replication success/failure. That is, the denominator of a replication percentage is set by the number of bootstrap iterations that are significant in the first cross-validation test. Therefore, to ensure this measure of 80% replication represented a true percentage, replication here also required that more than one bootstrap iteration (out of the total 100) replicated (as defined above). Without this criteria, the impact of sampling variability and the performance of a single bootstrap iteration ensured that a small number of BWAS would appear to intermittently have replication successes followed by replication failure for the very smallest sample sizes. Reproducibility estimates following Spisak et al. guidelines were highly consistent with those from our original work.
